Anesthesiology  
58:109, 1983

### Tank Wrench Holder for Ohio Modulus® Anesthesia Machine

*To the Editor:*—The majority of anesthesia machines now being manufactured conform to "American National Standard Minimum Performance and Safety Requirements for Components and Systems for Continuous-Flow Anesthesia Machines for Human Use" (ANSI® Z 79.8—1979). Although this standard specifically addresses hanger yokes (Section 5) and general requirements (Section 4.1), there is no specified location for hanger yokes given. Ohio Medical Products has chosen to locate their hanger yokes on the rear of their ANSI standard Modulus anesthesia machine. Access to tanks in the yokes is through an open section of the anesthesia machine's front panel. The tank valve-stems are located 2.25 inches below the top surface and are not visible from the front of the machine. It is not an easy task to fit a tank wrench onto a valve-stem under these conditions.

We have constructed a simple holder for T-type tank wrenches which mounts on the back of the anesthesia machine (fig. 1). This holder acts as a guide for the wrench to engage the stem, or alternatively, as a convenient way to hold the wrench in position on the stem. The holder is made from hardened aluminum, one long bar  $20.5 \times 0.5 \times 0.25$  inches, and four blocks  $1.25 \times 0.5 \times 1$  inches. These blocks have 0.55-inch D holes drilled and tapered to 0.75 inch D at the top for ease of tank-wrench insertion. The blocks are screwed on to the bar by drilling and tapping for two 6-32 screws in each block, with corresponding #28 holes countersunk for flat-head screws in the bar. The position of the blocks on the bar is so that their holes are aligned directly above the four tanks' valve-stems when the holder is mounted on the anesthesia machine. The mounting

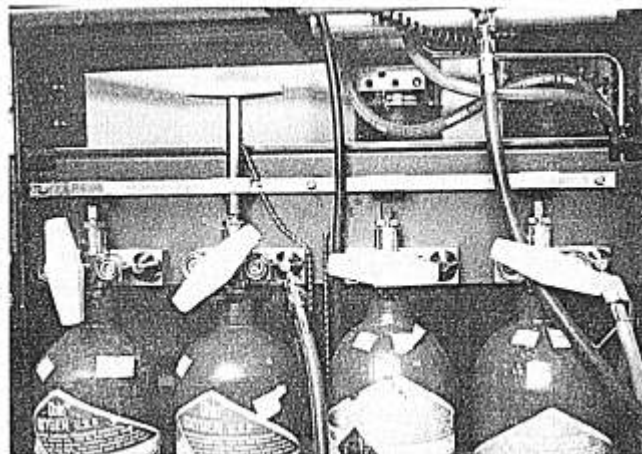

FIG. 1. Rear view of Ohio Modulus® anesthesia machine with tank wrench holder installed.

is done through three equi-spaced #3 holes in the bar and by drilling and tapping the back plate of the anesthesia machine for 10-32 screws. We have located the top of the holder 1.25 inches below the top surface of the anesthesia machine. The holder on a Modulus anesthesia machine is shown in the photograph.

ALVIN WALD, PH.D., C.C.E.  
Research Associate

JOHN T. NEIDZWSKI, B.S., C.B.E.T.  
Senior Technician  
Department of Anesthesiology  
Columbia Presbyterian Medical Center  
630 West 168th Street  
New York, New York 10032

(Accepted for publication July 26, 1982)

Anesthesiology  
58:109-110, 1983

### Heart Rate Response to Nociceptive Stimulation as an Index of Anesthetic Potency for Enflurane

*To the Editor:*—Roizen *et al.*<sup>1</sup> reported that while halothane blocks the cardiovascular responses (HR and BP) to incision in a dose-dependent fashion, enflurane does not. Therefore, they concluded that cardiovascular responses to incision do not reveal the depth of enflurane anesthesia. We have found that heart rate response to painful stimulation may be used to measure the depth of anesthesia induced by a number of intravenous and

inhaled anesthetics.<sup>2,3</sup> Since enflurane was not among the agents investigated in the above studies, we compared enflurane dose-effect curves for purposeful movement (PM) response and heart rate (HR) response to a noxious stimuli in rats. The results presented in figure 1 show that enflurane blocks heart rate response to a noxious stimuli in a dose-dependent fashion. The discrepancy between our results and those by Roizen *et al.*
